# Supplementary material for: Bifunctional pathways mediated by Pt clusters and Al2O3 in the catalytic combustion of dimethyl ether
Source: Royal Society of Chemistry journal article supplement (doi:10.1039/b702693e), 2007-01-01
Supplement: b702693e.pdf [file b702693e.pdf]

## Bifunctional Pathways Mediated by Pt Clusters and Al<sub>2</sub>O<sub>3</sub> in the Catalytic Combustion of Dimethyl Ether

Akio Ishikawa and Enrique Iglesia\*

Department of Chemical Engineering, University of California, Berkeley, CA 94720, USA. E-mail: iglesias@berkeley.edu; Fax: 510 642 4778; Tel: 510 642 9673

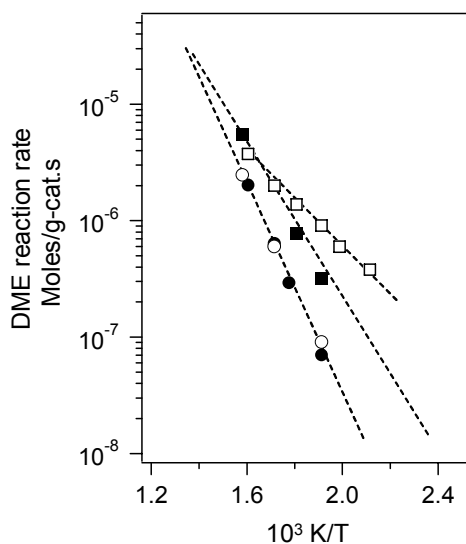

**Fig.** DME reaction rates (moles/g-cat.s) on (■) Al<sub>2</sub>O<sub>3</sub> and (●) SiO<sub>2</sub> at various temperatures. [250 mg, 250-450 μm, 2kPa DME, 20 kPa O<sub>2</sub>, with H<sub>2</sub>O (opened symbols) and without H<sub>2</sub>O (closed symbols), balanced He].
